# Supplementary material
Source: PubMed Central journal article supplement (PMC4256778)
Supplement: 00a0e087176f76c398279a7f7824a8dc_genetics.112.145359-3.pdf [file 00a0e087176f76c398279a7f7824a8dc_genetics.112.145359-3.pdf]

**Table S4** LSS (Least Sum of Squares) comparing our model to the observed projections, altering the amount of admixture from Neanderthals to non-Africans ( $f_{NEA-ANC1}$ ).

| Test Neanderthal |             |             |             |
|------------------|-------------|-------------|-------------|
| $f_{NEA-ANC1}$   | CEU         | CHB         | YRI         |
| 0                | 69.51       | 109.74      | 3.32        |
| 0.01             | 25.02       | 41.76       | 2.51        |
| 0.02             | 7.88        | 11.34       | 2.11        |
| 0.03             | <b>4.33</b> | <b>2.74</b> | 1.34        |
| 0.04             | 7.03        | 3.91        | 1.19        |
| 0.05             | 13.34       | 8.79        | <b>0.95</b> |
