# Supplementary material
Source: PubMed Central journal article supplement (PMC4256778)
Supplement: 2da9b331c17e94fafde7ae972effaf03_genetics.112.145359-2.pdf [file 2da9b331c17e94fafde7ae972effaf03_genetics.112.145359-2.pdf]

Table S1 LSS comparing the observed projections for reference CEU to each other. The diagonals compare that test genome to the  $\bar{w}(x) = 1$  line.

|          | Mandenka     | Papuan      | Han         | Yoruba       | Mbuti        | Dinka        | Deni         | San          | Altai         | French      |
|----------|--------------|-------------|-------------|--------------|--------------|--------------|--------------|--------------|---------------|-------------|
| Mandenka | <b>18.88</b> | 9.02        | 9.57        | 0.13         | 0.70         | 0.18         | 15.67        | 1.28         | 42.60         | 19.89       |
| Papuan   |              | <b>2.79</b> | 0.24        | 9.36         | 12.78        | 7.81         | 38.52        | 13.13        | 87.05         | 2.85        |
| Han      |              |             | <b>2.12</b> | 9.93         | 13.57        | 8.29         | 40.15        | 13.98        | 88.61         | 2.33        |
| Yoruba   |              |             |             | <b>19.28</b> | 0.65         | 0.22         | 15.38        | 1.27         | 41.66         | 20.33       |
| Mbuti    |              |             |             |              | <b>23.97</b> | 1.20         | 10.39        | 0.26         | 36.66         | 24.90       |
| Dinka    |              |             |             |              |              | <b>17.20</b> | 17.79        | 1.95         | 44.51         | 18.20       |
| Deni     |              |             |             |              |              |              | <b>53.26</b> | 8.49         | 29.67         | 53.79       |
| San      |              |             |             |              |              |              |              | <b>23.89</b> | 38.52         | 24.70       |
| Altai    |              |             |             |              |              |              |              |              | <b>112.92</b> | 115.23      |
| French   |              |             |             |              |              |              |              |              |               | <b>0.19</b> |
