# Supplementary material
Source: PubMed Central journal article supplement (PMC4256778)
Supplement: 4feab8823b4b1372455ba068f3f0cbad_genetics.112.145359-7.pdf [file 4feab8823b4b1372455ba068f3f0cbad_genetics.112.145359-7.pdf]

Table S2 LSS comparing the observed projections for reference CHB to each other. The diagonals compare that test genome to the  $\bar{w}(x) = 1$  line.

|          | Mandenka     | Papuan      | Han         | Yoruba       | Mbuti        | Dinka        | Deni         | San          | Altai         | French       |
|----------|--------------|-------------|-------------|--------------|--------------|--------------|--------------|--------------|---------------|--------------|
| Mandenka | <b>31.41</b> | 11.67       | 32.39       | 0.36         | 1.06         | 0.55         | 18.78        | 1.82         | 53.21         | 6.54         |
| Papuan   |              | <b>7.05</b> | 7.14        | 11.82        | 14.95        | 11.01        | 51.02        | 16.60        | 108.84        | 2.93         |
| Han      |              |             | <b>0.54</b> | 32.73        | 36.72        | 32.27        | 80.54        | 37.32        | 162.00        | 14.48        |
| Yoruba   |              |             |             | <b>31.67</b> | 1.07         | 0.52         | 18.45        | 1.82         | 52.67         | 6.60         |
| Mbuti    |              |             |             |              | <b>35.56</b> | 1.51         | 13.03        | 0.63         | 49.02         | 9.59         |
| Dinka    |              |             |             |              |              | <b>31.26</b> | 20.65        | 2.71         | 53.04         | 5.65         |
| Deni     |              |             |             |              |              |              | <b>78.26</b> | 10.88        | 30.14         | 41.54        |
| San      |              |             |             |              |              |              |              | <b>36.14</b> | 49.98         | 11.35        |
| Altai    |              |             |             |              |              |              |              |              | <b>158.14</b> | 85.85        |
| French   |              |             |             |              |              |              |              |              |               | <b>13.24</b> |
