# Supplementary material
Source: PubMed Central journal article supplement (PMC4256778)
Supplement: 6557ae97369429f3090fb964752b7ee4_genetics.112.145359-8.pdf [file 6557ae97369429f3090fb964752b7ee4_genetics.112.145359-8.pdf]

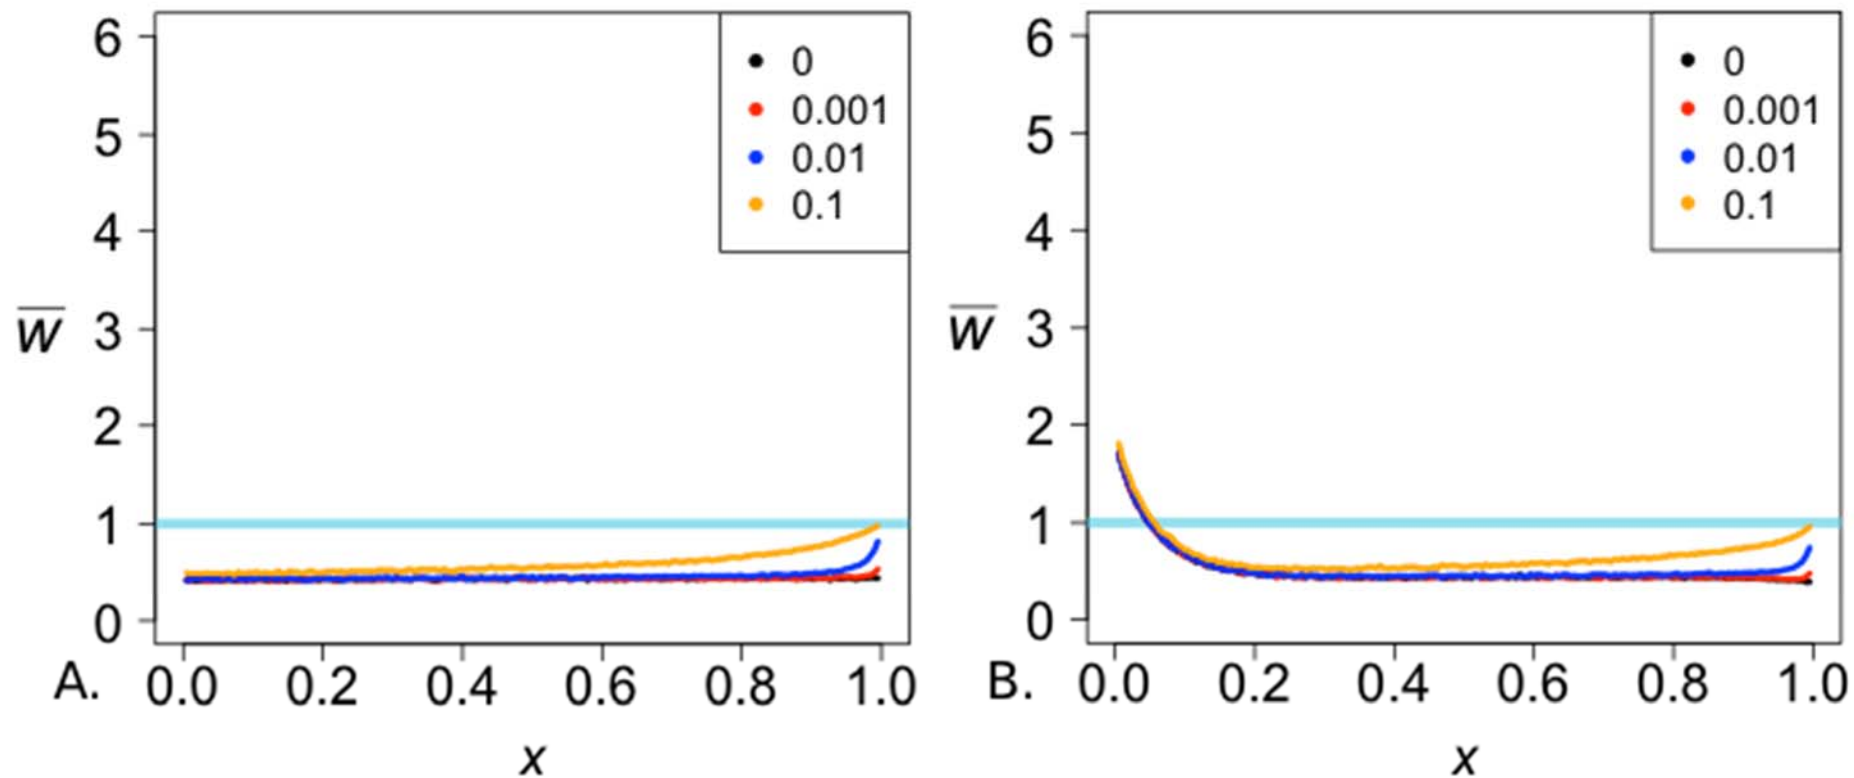

**Figure S1** Simulated projections with ancestral misidentification. The proportion of sites misidentified is given in the legend. For both models, the population is a constant size of 10,000 and the time of divergence is 400 kya. In part B, there is an additional admixture event of 0.02 from the test to the reference population at 50 kya.
