# Supplementary material
Source: PubMed Central journal article supplement (PMC4256778)
Supplement: 9848b956e55c021deb984fe960d50853_genetics.112.145359-9.pdf [file 9848b956e55c021deb984fe960d50853_genetics.112.145359-9.pdf]

**Table S5** LSS comparing our model to the observed projections, altering the population increase in the Yoruba population backwards in time ( $N_{ANC4}/N_{YOR}$ ) and the amount of admixture ( $f_{ANC1-ANC4}$ ) from Europeans to Yorubans.

| Test French        |             |                 |             |
|--------------------|-------------|-----------------|-------------|
| $N_{ANC4}/N_{YOR}$ | YRI         | $f_{ANC1-ANC4}$ | YRI         |
| 1                  | 4.44        | 0               | 2.72        |
| 2                  | 2.23        | 0.1             | 1.89        |
| 3                  | 1.51        | 0.2             | 1.16        |
| 4                  | 1.31        | 0.3             | 0.75        |
| 4.5                | <b>1.21</b> | 0.4             | <b>0.56</b> |
| 5                  | 1.32        | 0.5             | 0.59        |
