# Supplementary material
Source: PubMed Central journal article supplement (PMC4256778)
Supplement: 0292382b85c900513b2e38b6f180c681_genetics.112.145359-4.pdf [file 0292382b85c900513b2e38b6f180c681_genetics.112.145359-4.pdf]

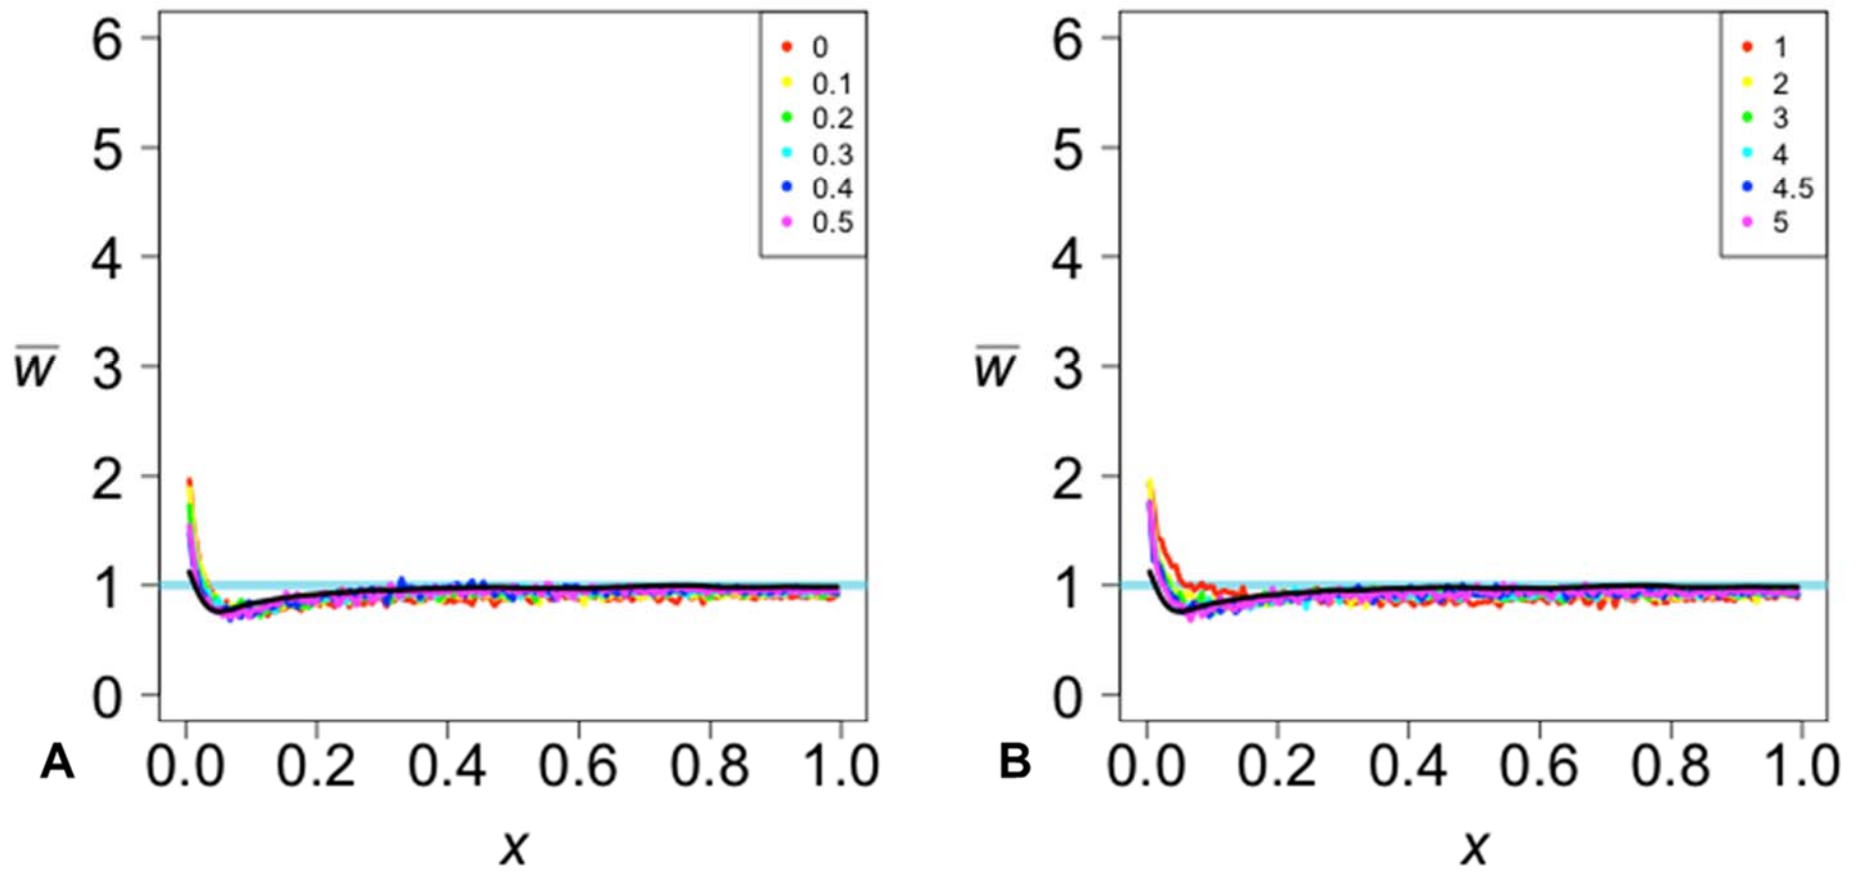

**Figure S3** The simulated projections for reference YRI and test French for our model when altering (A) the population increase in the Yoruba population backwards in time ( $N_{ANCA}/N_{YOR}$ ) and (B) the amount of admixture from Europeans to Yorubans ( $f_{ANCI-ANCA}$ ). The black line is the observed projection.
