# Supplementary material
Source: PubMed Central journal article supplement (PMC4256778)
Supplement: e64907f3cbb5282ded13b6a215c1b513_genetics.112.145359-5.pdf [file e64907f3cbb5282ded13b6a215c1b513_genetics.112.145359-5.pdf]

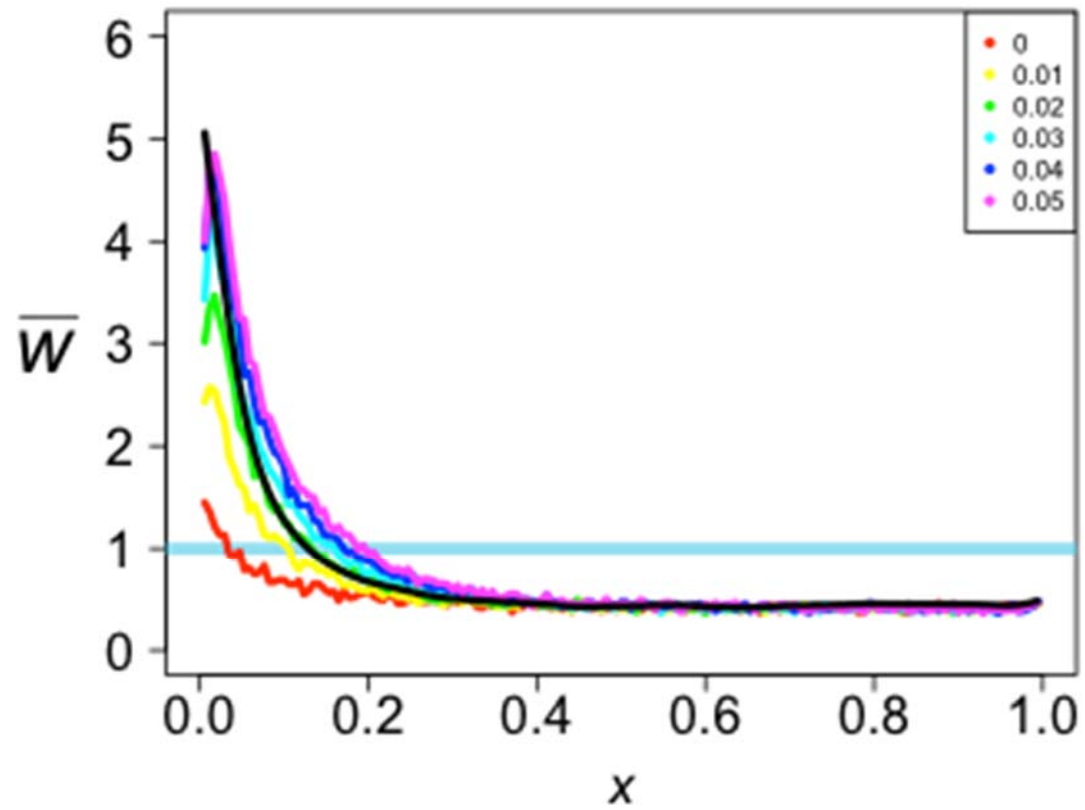

**Figure S2** The simulated projections for reference CEU and test Neanderthal for our model when altering the amount of admixture ( $f_{NEA-ANC1}$ ). The black line is the observed projection.
