# Supplementary material
Source: PubMed Central journal article supplement (PMC4256778)
Supplement: fb52fb88a26736ae439f659c51726f3a_genetics.112.145359-6.pdf [file fb52fb88a26736ae439f659c51726f3a_genetics.112.145359-6.pdf]

Table S3 LSS comparing the observed projections for reference YRI to each other. The diagonals compare that test genome to the  $\bar{w}(x) = 1$  line.

|          | Mandenka    | Papuan      | Han         | Yoruba      | Mbuti       | Dinka       | Deni         | San         | Altai        | French      |
|----------|-------------|-------------|-------------|-------------|-------------|-------------|--------------|-------------|--------------|-------------|
| Mandenka | <b>0.12</b> | 1.02        | 0.92        | 0.12        | 3.64        | 0.23        | 28.44        | 4.72        | 27.68        | 0.90        |
| Papuan   |             | <b>1.46</b> | 0.10        | 1.33        | 2.95        | 0.49        | 22.50        | 3.21        | 21.66        | 0.12        |
| Han      |             |             | <b>1.30</b> | 1.22        | 2.98        | 0.41        | 23.50        | 3.37        | 22.58        | 0.08        |
| Yoruba   |             |             |             | <b>0.10</b> | 4.21        | 0.36        | 29.90        | 5.41        | 29.22        | 1.20        |
| Mbuti    |             |             |             |             | <b>3.96</b> | 3.30        | 18.20        | 0.57        | 15.99        | 3.03        |
| Dinka    |             |             |             |             |             | <b>0.35</b> | 27.07        | 4.18        | 26.18        | 0.39        |
| Deni     |             |             |             |             |             |             | <b>30.78</b> | 13.18       | 0.57         | 24.12       |
| San      |             |             |             |             |             |             |              | <b>5.33</b> | 11.52        | 3.51        |
| Altai    |             |             |             |             |             |             |              |             | <b>29.87</b> | 23.16       |
| French   |             |             |             |             |             |             |              |             |              | <b>1.27</b> |
